# Supplementary material for: Three-dimensional poly-(ε-caprolactone) nanofibrous scaffolds directly promote the cardiomyocyte differentiation of murine-induced pluripotent stem cells through Wnt/β-catenin signaling
Source: PubMed Central journal article supplement (PMC4558999; doi:10.1186/s12860-015-0067-3), 2015-09-03
Supplement: 12860_2015_67_MOESM1_ESM.pdf [file 12860_2015_67_MOESM1_ESM.pdf]

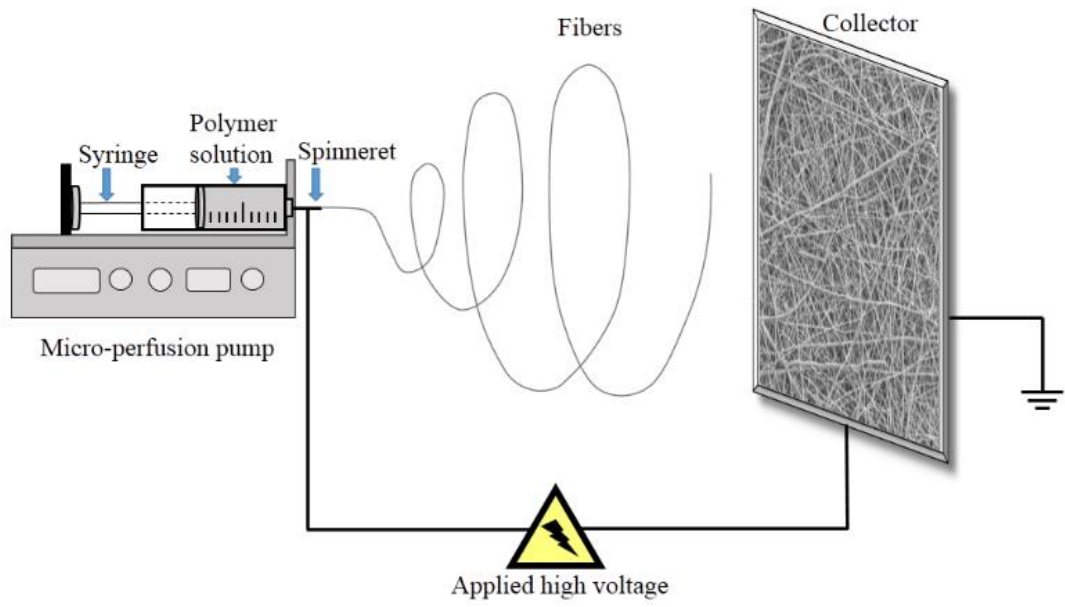

**Figure S1. Schematic diagram of a typical horizontal electrospinning system.**
